# Supplementary material for: Single-walled carbon nanohorns coated with Fe2O3 as a superior anode material for lithium ion batteries
Source: Royal Society of Chemistry journal article supplement (doi:10.1039/c1cc12171e), 2011-01-01
Supplement: c1cc12171e.pdf [file c1cc12171e.pdf]

# Single-walled carbon nanohorns coated with Fe<sub>2</sub>O<sub>3</sub> as a superior anode material for Lithium ion batteries

Yi Zhao, Jiaxin Li, Yunhai Ding, Lunhui Guan\*

State Key Laboratory of Structural Chemistry, Fujian Institute of Research on the Structure of Matter, Chinese Academy of Sciences, Yangqiao West Road 155#, Fuzhou, Fujian 350002, P.R. China.

E-mail: [guanlh@fjirsm.ac.cn](mailto:guanlh@fjirsm.ac.cn)

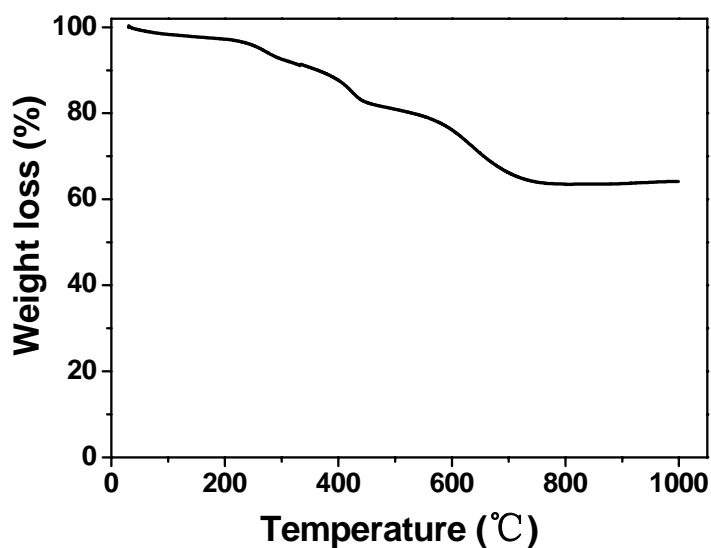

Fig. S1. Thermal gravimetric analysis (TGA) curves of Fe<sub>2</sub>O<sub>3</sub>/SWCNHs at a heating rate of 10 °C /min between 30 and 1000 °C.

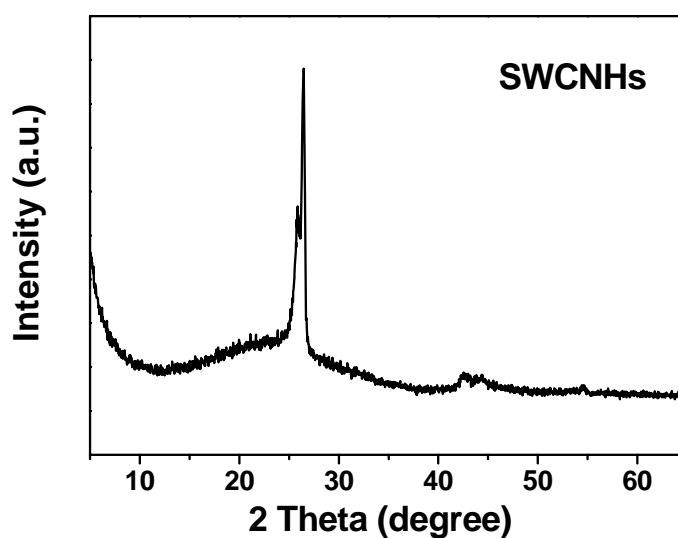

Fig. S2. XRD pattern of the SWCNHs produced from arc-discharge method.

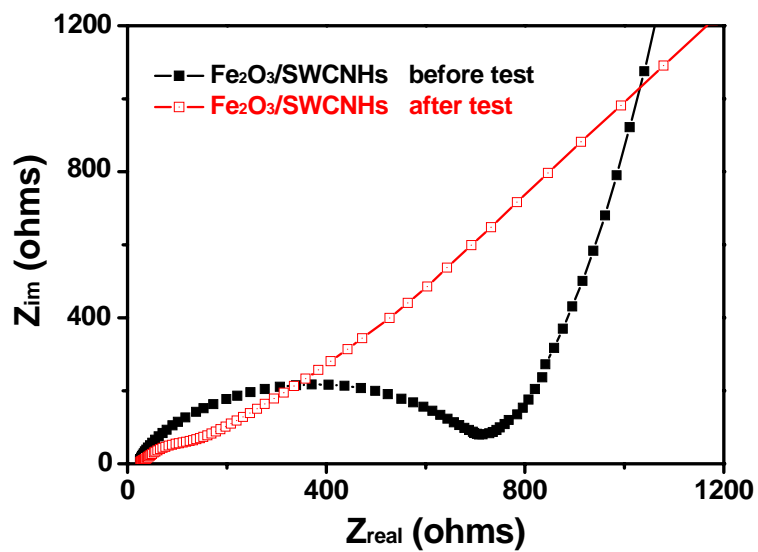

Fig. S3. Electrochemical impedance spectra for Fe<sub>2</sub>O<sub>3</sub>/SWCNHs composite electrodes before and after CVs test.
